# Supplementary material for: Role of temperature in the recombination reaction on dye-sensitized solar cells
Source: Royal Society of Chemistry journal article supplement (doi:10.1039/c5cp02942b), 2015-01-01
Supplement: c5cp02942b1.pdf [file c5cp02942b1.pdf]

## Supporting Information

### Temperature Role in the Recombination Reaction on Dye-Sensitized Solar Cells

José Maçaira, I. Mesquita, Luísa Andrade, Adélio Mendes\*

LEPABE - Faculdade de Engenharia, Universidade do Porto, rua Dr. Roberto Frias, 4200-465

Porto, Portugal

[mendes@fe.up.pt](mailto:mendes@fe.up.pt)

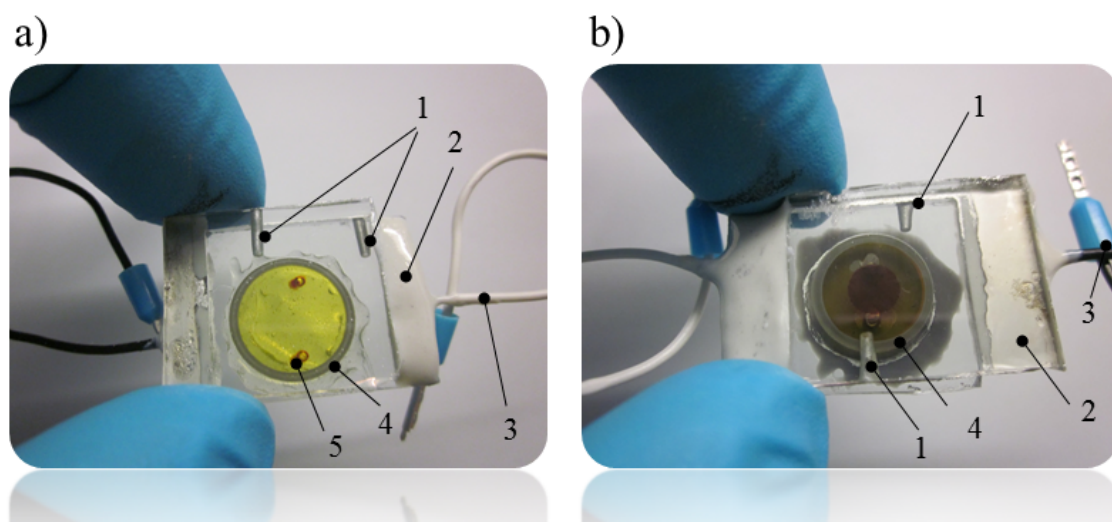

**Figure S1.** Photographs of the (a) laser sealed half-cells and (b) dye-sensitized solar cells: 1 – drilled hole for temperature measurement; 2 – electrical contact; 3 – electrical terminal; 4 – glass frit sealing; 5 – electrolyte filling hole.

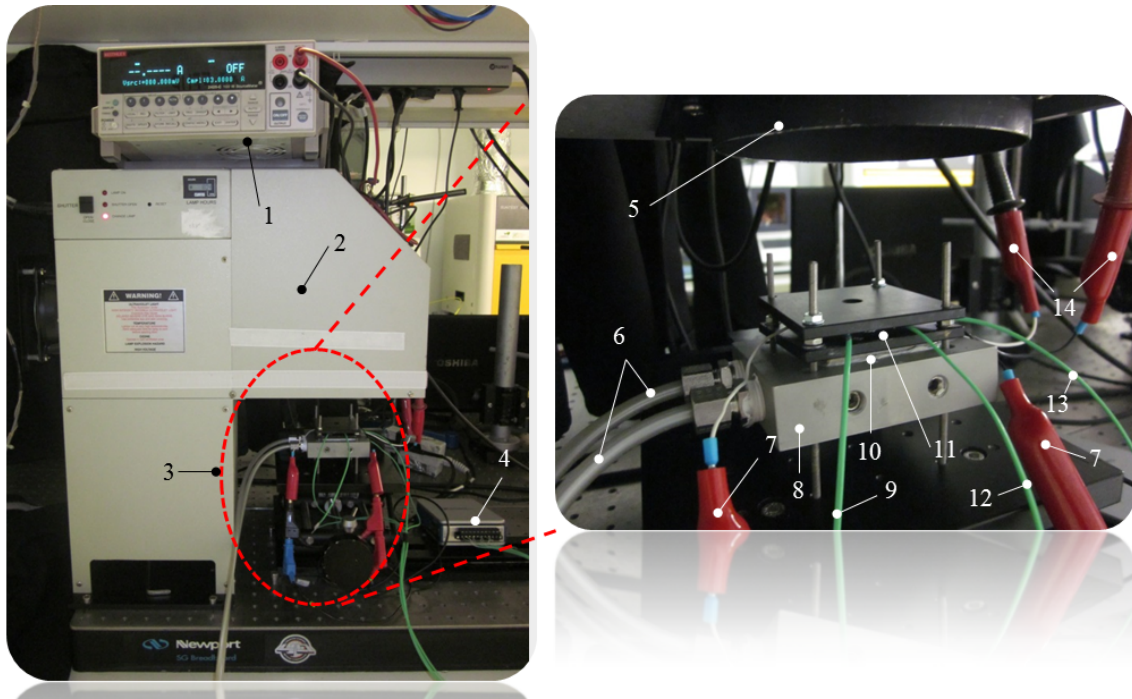

**Figure S2.** Experimental setup used for temperature control of an under illumination DSC between  $-5\text{ }^{\circ}\text{C}$  and  $105\text{ }^{\circ}\text{C}$ . 1-Keithley DC supply; 2-Newport solar simulator; 3-temperature control unit; 4- NI acquisition board; 5- solar simulator ; 6- cooling fluid lines; 7- DSC electrical connections to autolab potentiostat; 8- aluminum slab with drilled thermal fluid circuit; 9 –thermocouple  $T_2$  ; 10 – peltier device; 11 – DSC; 12- thermocouple  $T_1$  ; thermocouple  $T_3$ ; 14 – electrical connections from peltier device to Keithley DC supply

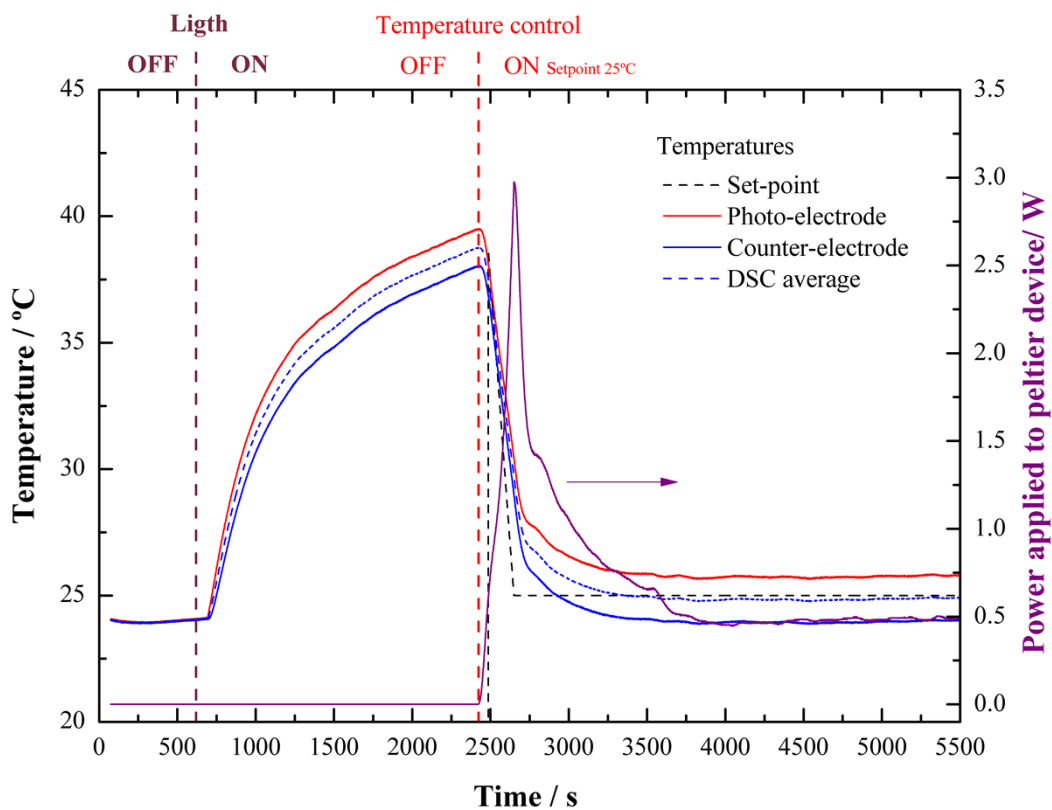

**Figure S3.** Temperature measurements of an illuminated DSC ( $100\text{mW}\cdot\text{cm}^{-2}$ , AM 1.5); with and without temperature control.

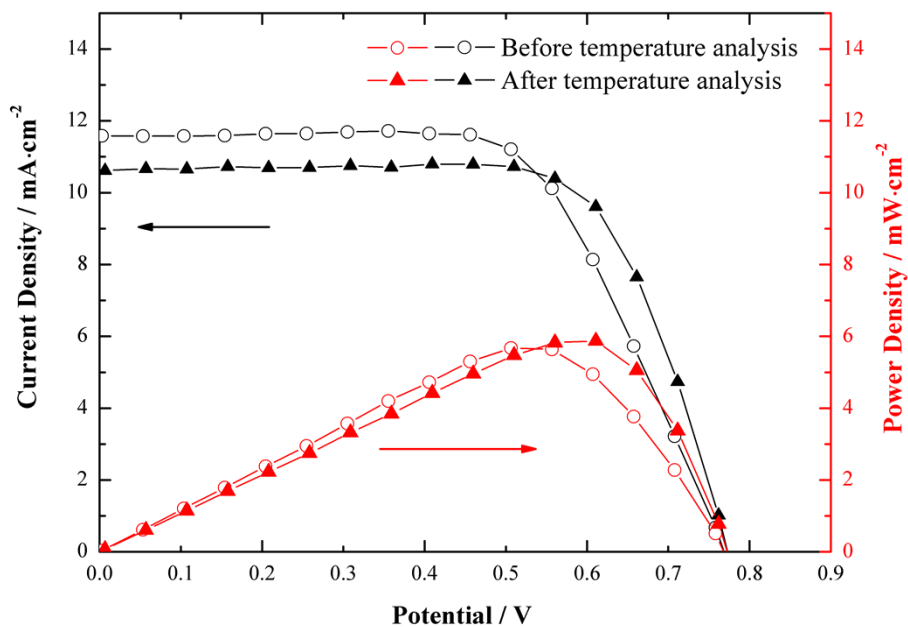

**Figure S4.**  $I$ - $V$  and power density curves for a DSC before and after sustaining the temperature analysis range from 0 to 100 °C. Lines were added for readability.

**Table S1.** Performance parameters, obtained at 25°C, of samples that underwent the temperature analysis, before and after the tests.

| Parameter                    | Before temperature tests | After temperature tests |
|------------------------------|--------------------------|-------------------------|
| $V_{OC} / V$                 | 0.773                    | 0.777                   |
| $J_{SC} / \text{mA.cm}^{-2}$ | 11.3                     | 10.8                    |
| MMP / $\text{mW.cm}^{-2}$    | 5.72                     | 5.95                    |
| FF                           | 0.655                    | 0.712                   |
| $\eta / \%$                  | 5.83                     | 6.07                    |

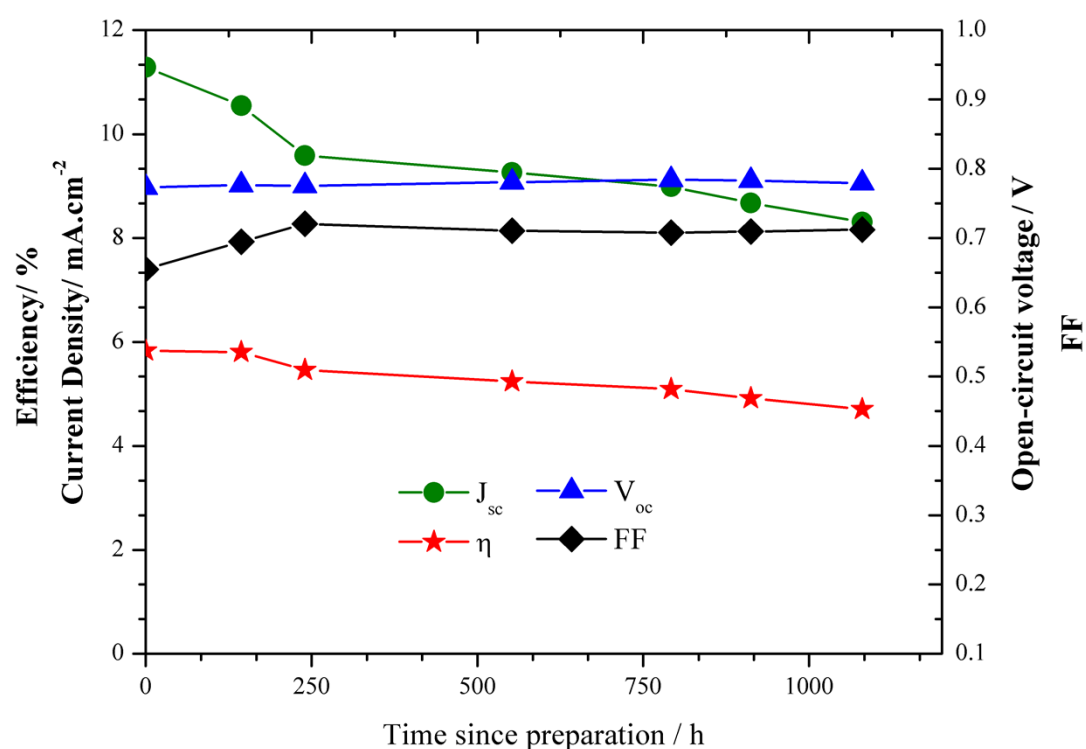

**Figure S5.** Performance parameters vs time since preparation of samples that underwent the temperature analysis (0 to 100°C):  $V_{OC}$  – open circuit voltage;  $J_{SC}$  – short circuit current density;  $FF$  – fill factor;  $\eta$  – photo conversion efficiency. Lines were added for readability.

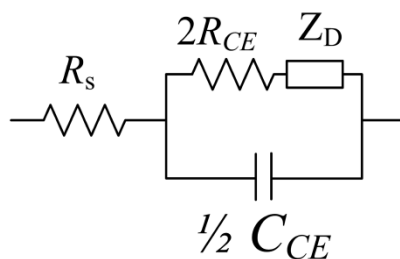

**Figure S6.** Electrical analogue used for fitting the electrochemical impedance spectra of half-cells.  $R_s$  – series resistances ;  $R_{CE}$  – charge transfer at catalytic interface;  $C_{CE}$  double layer capacitance at catalytic interface;  $Z_d$ - Nernst diffusion within electrolyte

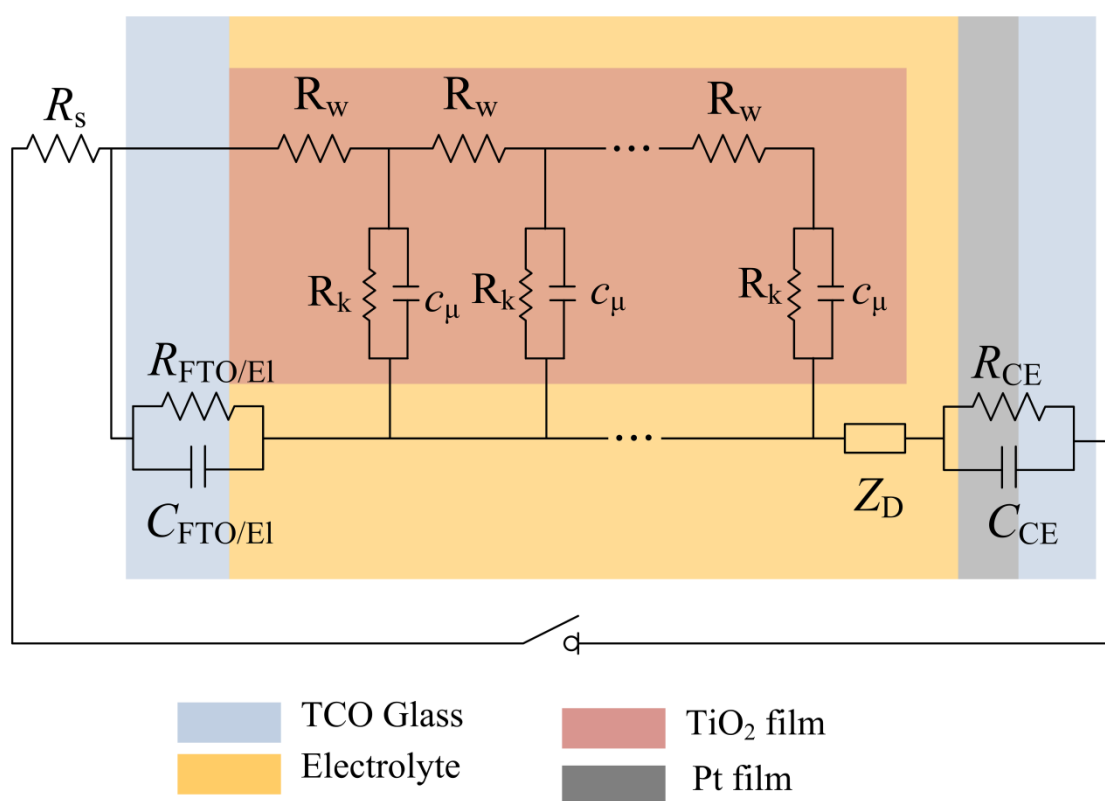

**Figure S7.** Transmission line model used to fit EIS experimental data of DSCs.  $R_s$  – series resistances;  $R_{TCO/EL}$  – charge transfer resistance at exposed TCO/electrolyte interface;  $C_{TCO/EL}$  double layer capacitance at exposed TCO/electrolyte interface;  $R_k$  – recombination resistance;  $R_w$  – transport resistance;  $c_\mu$  – chemical capacitance;  $Z_d$ - Nernst diffusion within electrolyte;  $R_{CE}$  – charge transfer at platinum/TCO interface;  $C_{CE}$  double layer capacitance at the platinum/TCO interface

**Table S2.** Performance parameters at 25°C of the five batches of DSCs presented in Figure 12.

| Parameter                                          | Batch n°    |             |             |             |             |
|----------------------------------------------------|-------------|-------------|-------------|-------------|-------------|
|                                                    | $k_1$       | $k_2$       | $k_3$       | $k_4$       | $k_5$       |
| $V_{OC,25^\circ C} / V$                            | 0.719±0.003 | 0.727±0.004 | 0.734±0.005 | 0.739±0.005 | 0.777±0.008 |
| $J_{SC,25^\circ C} / \text{mA}\cdot\text{cm}^{-2}$ | 7.67±0.40   | 9.03±0.05   | 9.95±0.43   | 10.27±0.45  | 11.53±0.41  |
| FF <sub>25°C</sub>                                 | 0.641±0.046 | 0.632±0.046 | 0.665±0.012 | 0.645±0.032 | 0.638±0.035 |
| $\eta_{25^\circ C} / \%$                           | 3.60±0.08   | 4.23±0.31   | 4.86±0.12   | 4.99±0.18   | 5.80±0.16   |
